# Supplementary material for: Aphrodisiac Performance of Bioactive Compounds from Mimosa pudica Linn.: In Silico Molecular Docking and Dynamics Simulation Approach
Source: MDPI journal article supplement (doi:10.3390/molecules27123799), 2022-06-13
Supplement: s1 [file s1]

Table S1. Bioactive molecules from *Mimosa pudica* Linn.

| S. No | Compound ID | Bioactive Molecules | Structure                                                                            | Literature source |
|-------|-------------|---------------------|--------------------------------------------------------------------------------------|-------------------|
| 1.    | 94477       | Mimosinamine        | 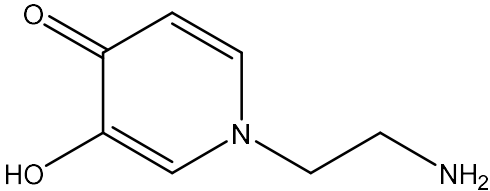   | [72]              |
| 2.    | 125409      | Beta-D-xylopyranose |    | [34]              |
| 3.    | 190359      | Mimosinic Acid      |   | [72]              |
| 4.    | 370         | Gallic Acid         |  | [34]              |
| 5.    | 951         | DL-Norepinephrine   |  | [34]              |

|     |          |                     |  |         |
|-----|----------|---------------------|--|---------|
| 6.  | 164619   | D-Pinitol           |  | [73]    |
| 7.  | 3862     | Mimosine            |  | [34,73] |
| 8.  | 1153     | DL-tyrosine         |  | [34]    |
| 9.  | 71684438 | Octadecadienoicacid |  | [34]    |
| 10. | 94715    | D-Glucopyranuronate |  | [72]    |

|     |           |                |                                                                                      |      |
|-----|-----------|----------------|--------------------------------------------------------------------------------------|------|
| 11. | 5280441   | Vitexin        | 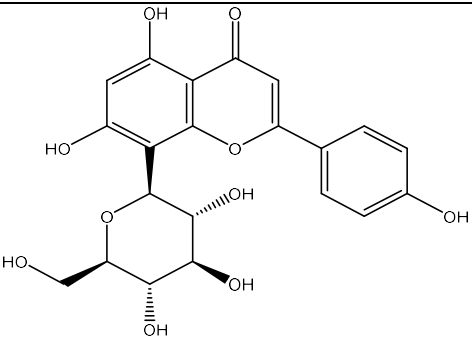   | [74] |
| 12. | 440473    | L-Mimosine     |    | [75] |
| 13. | 5281166   | Jasmonic Acid  |   | [76] |
| 14. | 5375199   | Absciscic acid |  | [73] |
| 15. | 100927206 | Mimopudine     |  | [75] |

|     |         |                 |                                                                                      |      |
|-----|---------|-----------------|--------------------------------------------------------------------------------------|------|
| 16. | 5280489 | Beta-Carotene   | 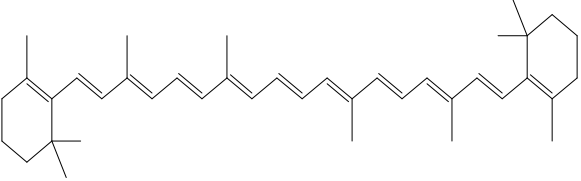   | [34] |
| 17. | 5281679 | Methylquercetin |    | [73] |
| 18. | 64971   | Betulinic Acid  |   | [73] |
| 19. | 222284  | Beta-sitosterol |  | [77] |

|     |          |                          |                                                                                      |      |
|-----|----------|--------------------------|--------------------------------------------------------------------------------------|------|
| 20. | 5490064  | Avicularin               | 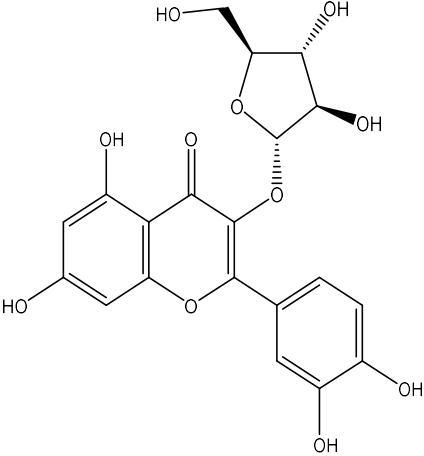   | [78] |
| 21. | 5281675  | Orientin                 |   | [72] |
| 22. | 114776   | Isoorientin              |  | [72] |
| 23. | 70698280 | Cassiaoccidentalinalin B |  | [72] |

|     |         |               |                                                                                      |      |
|-----|---------|---------------|--------------------------------------------------------------------------------------|------|
| 24. | 5280804 | Isoquercitrin | 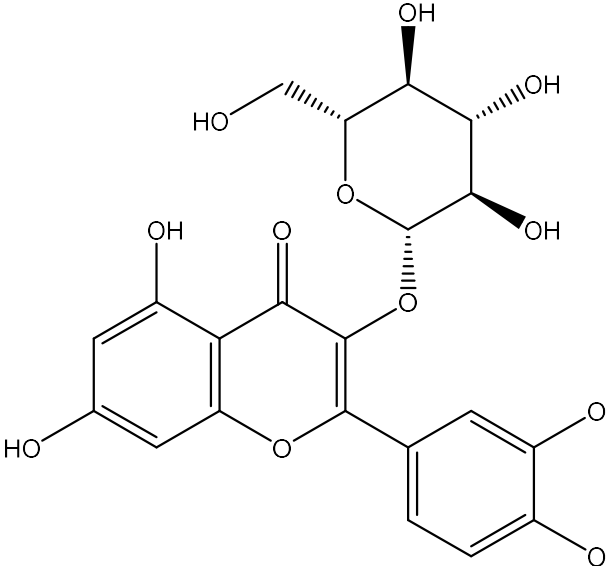   | [72] |
| 25. | 162350  | Isovitexin    |   | [74] |
| 26. | 5280704 | Apigetrin     |  | [73] |
| 27. | 5280794 | Stigmasterol  |  | [74] |

|     |          |               |                                                                                    |      |
|-----|----------|---------------|------------------------------------------------------------------------------------|------|
| 28. | 46173848 | Bufadienolide | 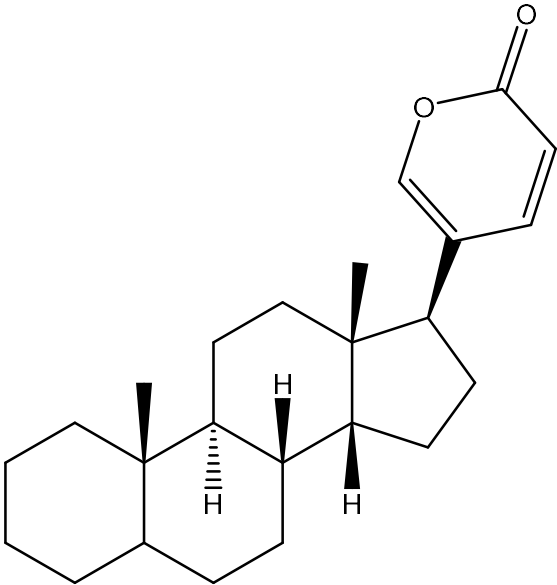 | [72] |
|-----|----------|---------------|------------------------------------------------------------------------------------|------|

Table S2. Details of bonding interactions between phosphodiesterase type 5 enzyme with selected bioactive molecules and standard drug.

| Compounds     | Residues | Amino acid | Distance (Å) | Bond category |
|---------------|----------|------------|--------------|---------------|
| Bufadienolide | 612A     | TYR        | 3.53         | Hydrophobic   |
|               | 662A     | ASN        | 3.77         | Hydrophobic   |
|               | 725A     | LEU        | 3.48         | Hydrophobic   |
|               | 725A     | LEU        | 3.72         | Hydrophobic   |
|               | 782A     | VAL        | 3.29         | Hydrophobic   |
|               | 786A     | PHE        | 3.39         | Hydrophobic   |
|               | 820A     | PHE        | 3.45         | Hydrophobic   |
|               | 820A     | PHE        | 3.67         | Hydrophobic   |
|               | 820A     | PHE        | 3.7          | Hydrophobic   |
|               | 775A     | GLN        | 2.23         | Hydrogen      |
|               | 817A     | GLN        | 2.97         | Hydrogen      |
| Stigmasterol  | 725A     | LEU        | 3.09         | Hydrophobic   |
|               | 765A     | LEU        | 3.74         | Hydrophobic   |
|               | 765A     | LEU        | 3.58         | Hydrophobic   |
|               | 767A     | ALA        | 3.7          | Hydrophobic   |
|               | 768A     | ILE        | 3.43         | Hydrophobic   |
|               | 778A     | ILE        | 3.97         | Hydrophobic   |
|               | 782A     | VAL        | 3.4          | Hydrophobic   |
|               | 786A     | PHE        | 3.62         | Hydrophobic   |
|               | 820A     | PHE        | 3.69         | Hydrophobic   |
|               | 724A     | ASP        | 2.19         | Hydrogen      |

|            |      |     |      |                            |
|------------|------|-----|------|----------------------------|
|            | 724A | ASP | 2.03 | Hydrogen                   |
|            | 725A | LEU | 3.23 | Hydrogen                   |
| Apigetrin  | 725A | LEU | 3.85 | Hydrophobic                |
|            | 820A | PHE | 3.66 | Hydrophobic                |
|            | 820A | PHE | 3.86 | Hydrophobic                |
|            | 612A | TYR | 1.77 | Hydrogen                   |
|            | 612A | TYR | 2.18 | Hydrogen                   |
|            | 613A | HIS | 2.63 | Hydrogen                   |
|            | 654A | ASP | 3.03 | Hydrogen                   |
|            | 657A | HIS | 3.12 | Hydrogen                   |
|            | 662A | ASN | 2.61 | Hydrogen                   |
|            | 682A | GLU | 2.94 | Hydrogen                   |
|            | 685A | HIS | 2.09 | Hydrogen                   |
|            | 724A | ASP | 2.61 | Hydrogen                   |
|            | 786A | PHE | 5.46 | $\pi$ -Stacking            |
|            | 820A | PHE | 4.04 | $\pi$ -Stacking            |
|            | 613A | HIS | 5.49 | $\pi$ -Cation Interactions |
| Isovitexin | 765A | LEU | 3.87 | Hydrophobic                |
|            | 767A | ALA | 3.95 | Hydrophobic                |
|            | 768A | ILE | 3.79 | Hydrophobic                |
|            | 782A | VAL | 3.69 | Hydrophobic                |
|            | 612A | TYR | 2.88 | Hydrogen                   |
|            | 613A | HIS | 3.58 | Hydrogen                   |
|            | 661A | ASN | 1.91 | Hydrogen                   |
|            | 662A | ASN | 3.52 | Hydrogen                   |
|            | 662A | ASN | 3.06 | Hydrogen                   |
|            | 723A | THR | 2.54 | Hydrogen                   |
|            | 724A | ASP | 2.03 | Hydrogen                   |
|            | 725A | LEU | 1.8  | Hydrogen                   |
|            | 764A | ASP | 2.16 | Hydrogen                   |
|            | 767A | ALA | 3.09 | Hydrogen                   |
|            | 775A | GLN | 2.06 | Hydrogen                   |
| Sildenafil | 612A | TYR | 3.59 | Hydrophobic                |
|            | 813A | ILE | 3.74 | Hydrophobic                |
|            | 817A | GLN | 3.83 | Hydrophobic                |
|            | 820A | PHE | 3.91 | Hydrophobic                |
|            | 613A | HIS | 2.22 | Hydrogen                   |
|            | 786A | PHE | 5.34 | $\pi$ -Stacking            |



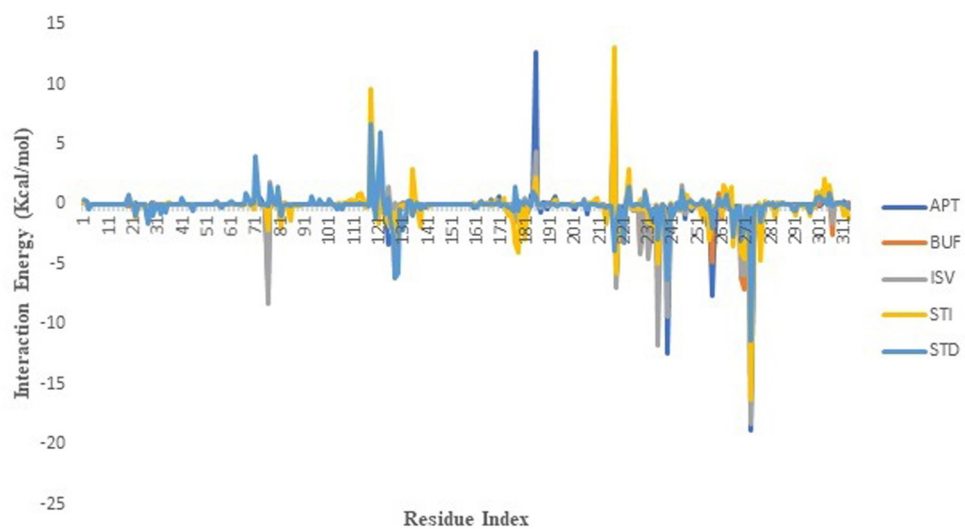

Figure S1. Per-residue energy decomposition of PDE5-APO (Black), PDE5-BUF (Green), PDE5-STI (Yellow), PDE5-ISV (Blue), PDE5-APT (Red) and PDE5-STD drug Sildenafil (Brown).
